# Supplementary material for: Identification of the first selective bioluminescent probe for real-time monitoring of carboxylesterase 2 in vitro and in vivo
Source: Royal Society of Chemistry journal article supplement (doi:10.1039/d3an01745a), 2023-11-25
Supplement: d3an01745a1.pdf [file d3an01745a1.pdf]

**Identification of the first selective bioluminescent probe for real-time monitoring  
of carboxylesterase 2 *in vitro* and *in vivo***

Yuhao Chen,<sup>a,b,†</sup> Tiantian Zhao,<sup>a,†</sup> Zhuang Miao,<sup>a,†</sup> Tianguang Huang,<sup>a</sup> Meiyuan Chen,<sup>a</sup>  
Yi Zhao,<sup>a</sup> Ao Hai,<sup>a</sup> Qingrong Qi,<sup>b</sup> Ping Feng,<sup>c,\*</sup> Minyong Li,<sup>d,\*</sup> and Bowen Ke<sup>a,\*</sup>

<sup>a</sup>Department of Anesthesiology, Laboratory of Anesthesia and Critical Care Medicine, National-Local Joint Engineering Research Centre of Translational Medicine of Anesthesiology, Frontiers Science Center for Disease-related Molecular Network, West China Hospital, Sichuan University, Chengdu, Sichuan 610041, China.

<sup>b</sup>West China School of Pharmacy, Sichuan University, Chengdu, Sichuan 610041, China.

<sup>c</sup>Institute of Clinical Trials, West China Hospital, Sichuan University, Chengdu, Sichuan 610041, China.

<sup>d</sup>Department of Medicinal Chemistry, Key Laboratory of Chemical Biology (MOE), School of Pharmacy, Shandong University, Jinan, Shandong 250012, China.

<sup>†</sup> These authors contributed equally.

**Corresponding Authors**

\*E-mail: bowenke@scu.edu.cn (B.K.).

\*E-mail: mli@sdu.edu.cn (M.L.).

\*E-mail: pfyq@yahoo.com (P.F.).

## Synthetic routes

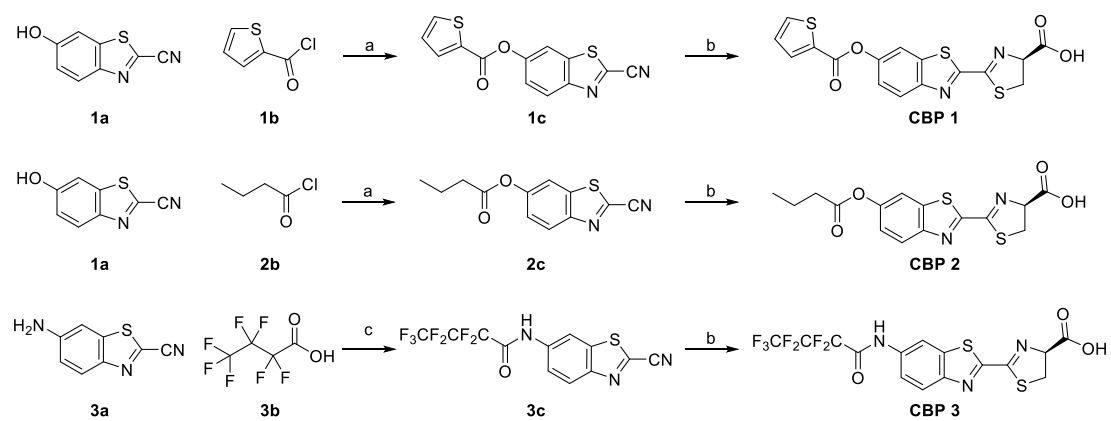

**Scheme S1.** The syntheses of the designed probes. a)  $\text{NEt}_3$ ,  $\text{CH}_2\text{Cl}_2$ , 98% for **1c**, and 61% for **2c**; b)  $\text{K}_2\text{CO}_3$ , D-cysteine·HCl,  $\text{H}_2\text{O}/\text{MeOH}$ , 36% for **CBP 1**, 26% for **CBP 2** and 85% for **CBP 3**; c) EDCI, DMAP,  $\text{CH}_2\text{Cl}_2$ , 43%.

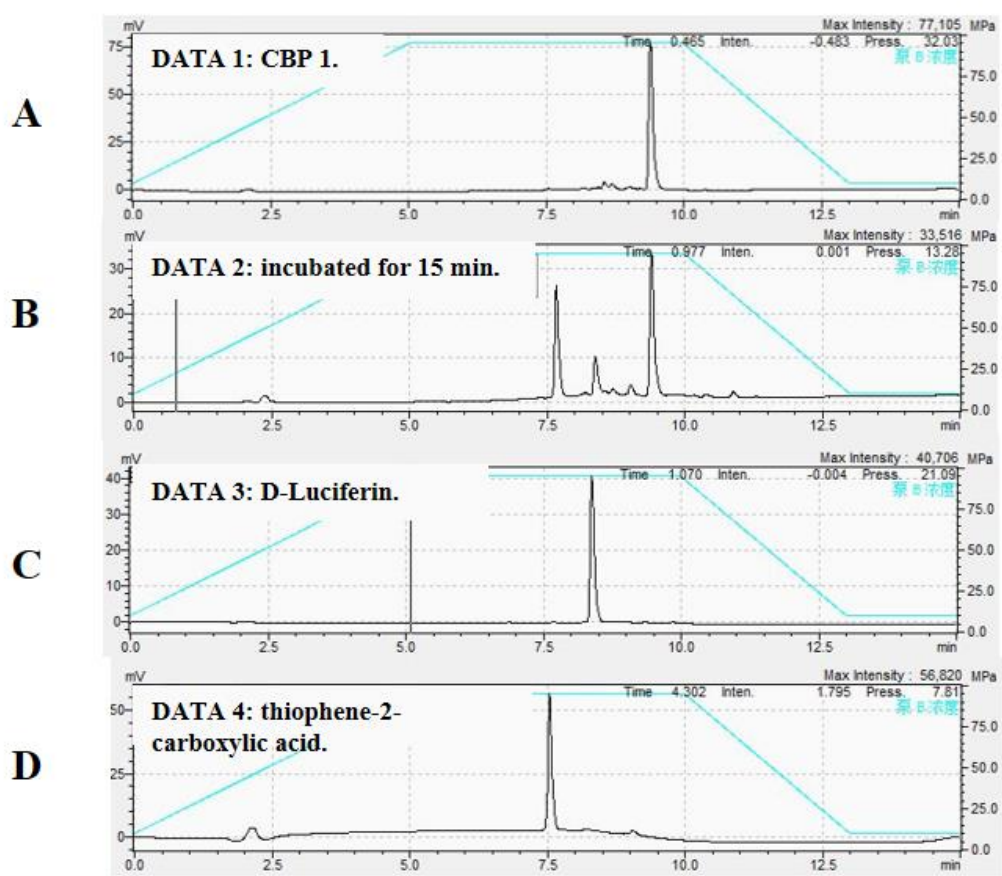

**Figure S1.** The HPLC analyses of **CBP 1** with CES2: **(A)** **CBP 1** (10 mM); **(B)** **CBP 1** (10 mM, 0.5 mL) with CES2 (5  $\mu$ g/mL, 0.5 mL); **(C)** Luciferin (10 mM); **(D)** Thiophene-2-carboxylic acid (10 mM).

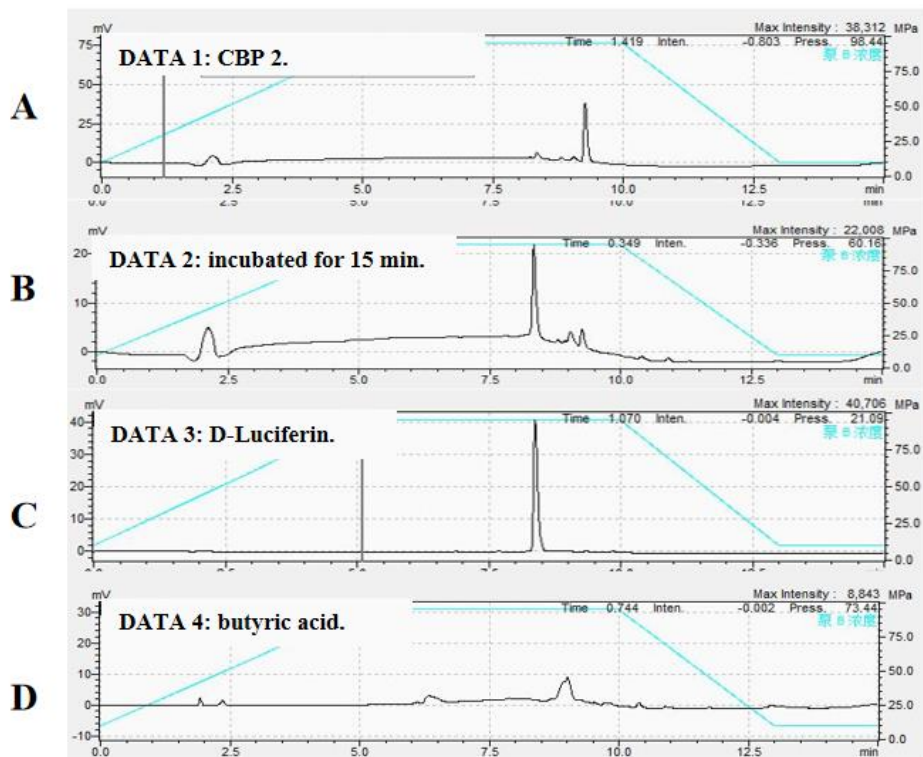

**Figure S2.** The HPLC analyses of **CBP 2** with CES2: **(A) CBP 2** (10 mM); **(B) CBP 2** (10 mM, 0.5 mL) with CES2 (5  $\mu$ g/mL, 0.5 mL); **(C)** Luciferin (10 mM); **(D)** Butyric acid (10 mM).

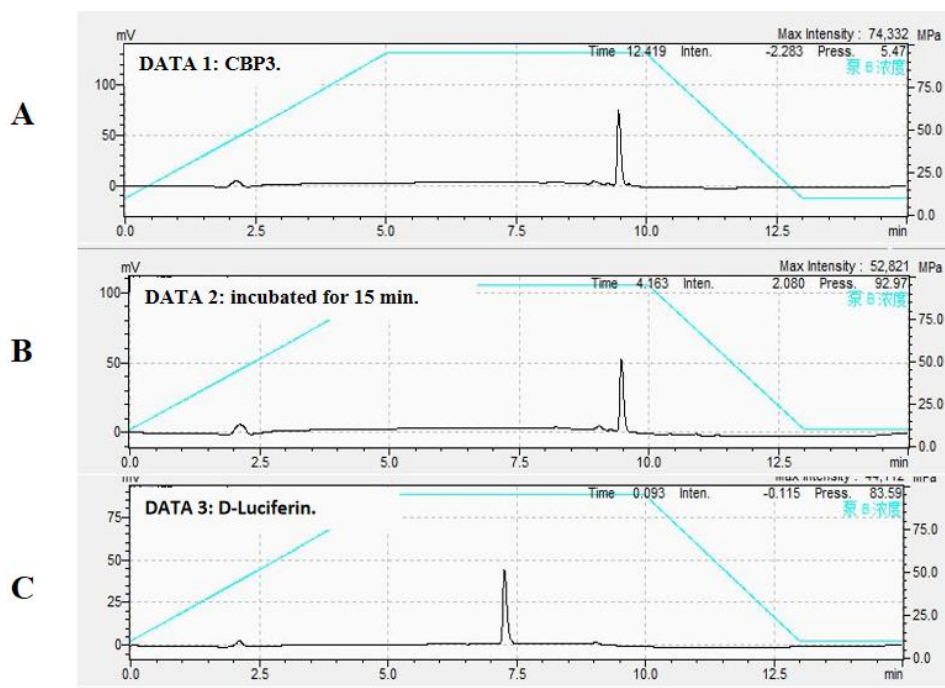

**Figure S3.** The HPLC analyses of **CBP 3** with CES2: (A) **CBP 3** (10 mM); (B) **CBP 3** (10 mM, 0.5 mL) with CES2 (5  $\mu\text{g}/\text{mL}$ , 0.5 mL); (C) Luciferin (10 mM).

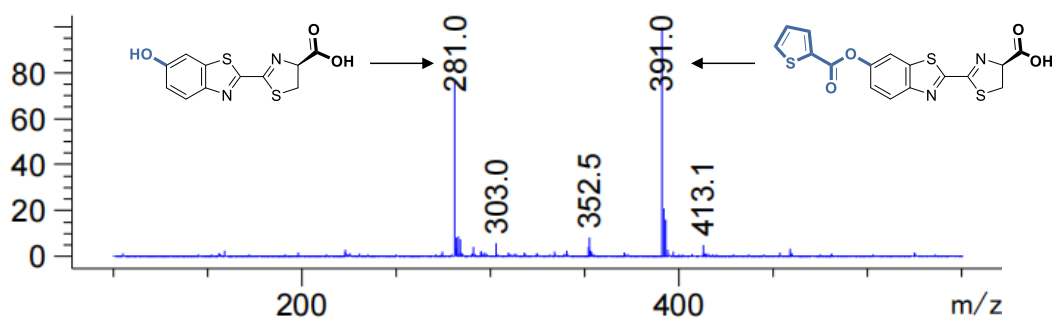

**Figure S4.** The ESI-MS spectrum of **CBP 1** (10 mM) upon incubation with CES2 (5  $\mu\text{g}/\text{mL}$ ).

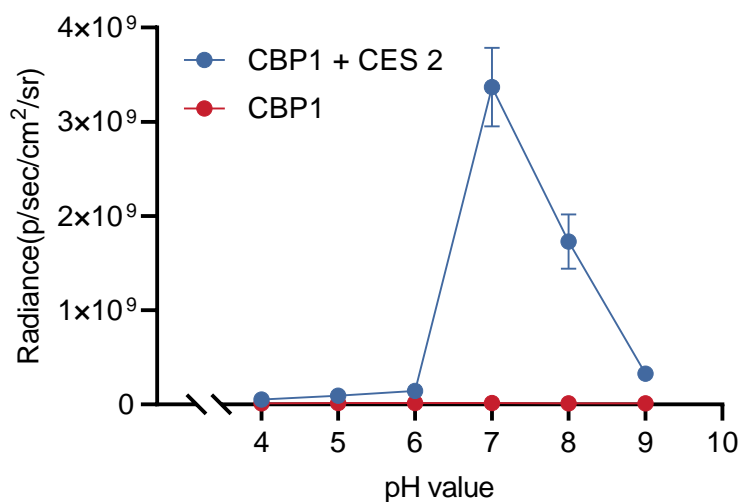

**Figure S5.** The influence of pH value on the CES2 detection by **CBP 1** (n = 3). Each value was represented as mean ± SEM.

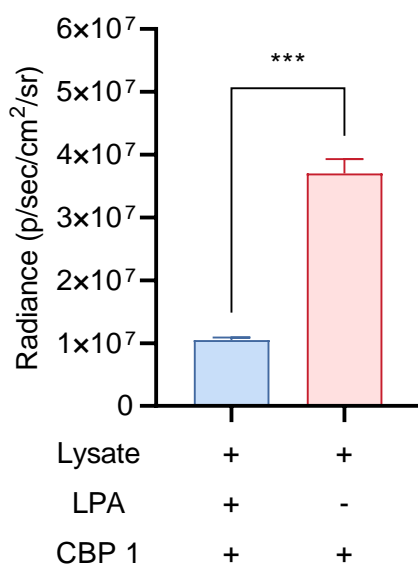

**Figure S6.** The investigation of the CES2 specificity of **CBP 1** by using the cell lysate (n = 3). \*\*\*  $P < 0.001$ , according to unpaired  $t$  test. Each value was represented as mean ± SEM.

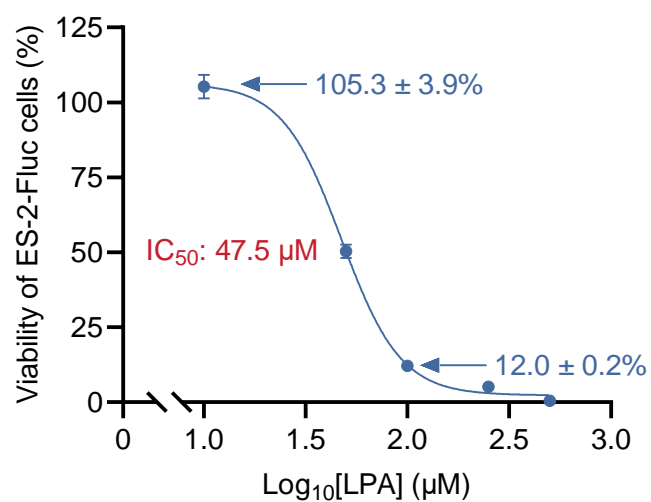

**Figure S7.** The viability of ES-2-Fluc cells after incubating with different concentrations of LPA (n = 3). Each value was represented as mean ± SEM, and the IC<sub>50</sub> value was fitted by GraphPad Prism 8.

**Table S1.** Representative studies for CES2 detection

| Chemical structure<br>(Strategy)                                                                                | $\lambda_{ex}/em$<br>(nm) | $K_m$<br>( $\mu M$ ) | LOD               | Reference |
|-----------------------------------------------------------------------------------------------------------------|---------------------------|----------------------|-------------------|-----------|
| 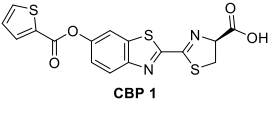<br>CBP 1<br>(Bioluminescence) | /                         | 5.80                 | 0.0045 $\mu g/mL$ | This work |
| <br>(Fluorescence)             | 380/560                   | $3.48 \pm 0.61$      | /                 | 1         |
| <br>(Fluorescence)             | 548/605                   | $6.60 \pm 3.70$      | /                 | 2         |
| <br>(Fluorescence)            | 430/542                   | $8.58 \pm 0.55$      | 0.012 $\mu g/mL$  | 3         |
| <br>(Fluorescence)           | 450/560                   | 21.72                | 1.986 $\mu g/mL$  | 4         |
| <br>(Fluorescence)           | 590/640                   | 0.93                 | 0.017 $\mu g/mL$  | 5         |
| <br>(Fluorescence)           | 560/612                   | $3.06 \pm 0.57$      | 0.460 $\mu g/mL$  | 6         |
| <br>(Fluorescence)           | 498/660                   | /                    | 0.165 $ng/mL$     | 7         |



|                                                                                                            |         |             |              |    |
|------------------------------------------------------------------------------------------------------------|---------|-------------|--------------|----|
| 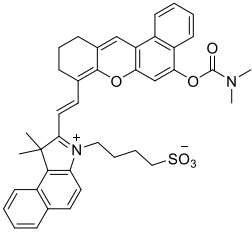<br>(Fluorescence)        | 675/850 | < 5.00      | 0.023 µg/mL  | 8  |
| <br>(Fluorescence)        | 830/685 | 33.43       | 0.087 µg/mL  | 9  |
| <br>(Fluorescence)        | 630/678 | /           | 0.030 µg/mL  | 10 |
| <br>(Fluorescence)       | 600/662 | 1.92 ± 0.31 | 0.070 µg/mL  | 11 |
| <br>(Chemiluminescence) | /       | /           | 0.0082 µg/mL | 12 |
| Capillary Electrophoresis                                                                                  | /       | /           | 0.827 mg/mL  | 13 |



### <sup>13</sup>C-NMR spectra of CBP 1

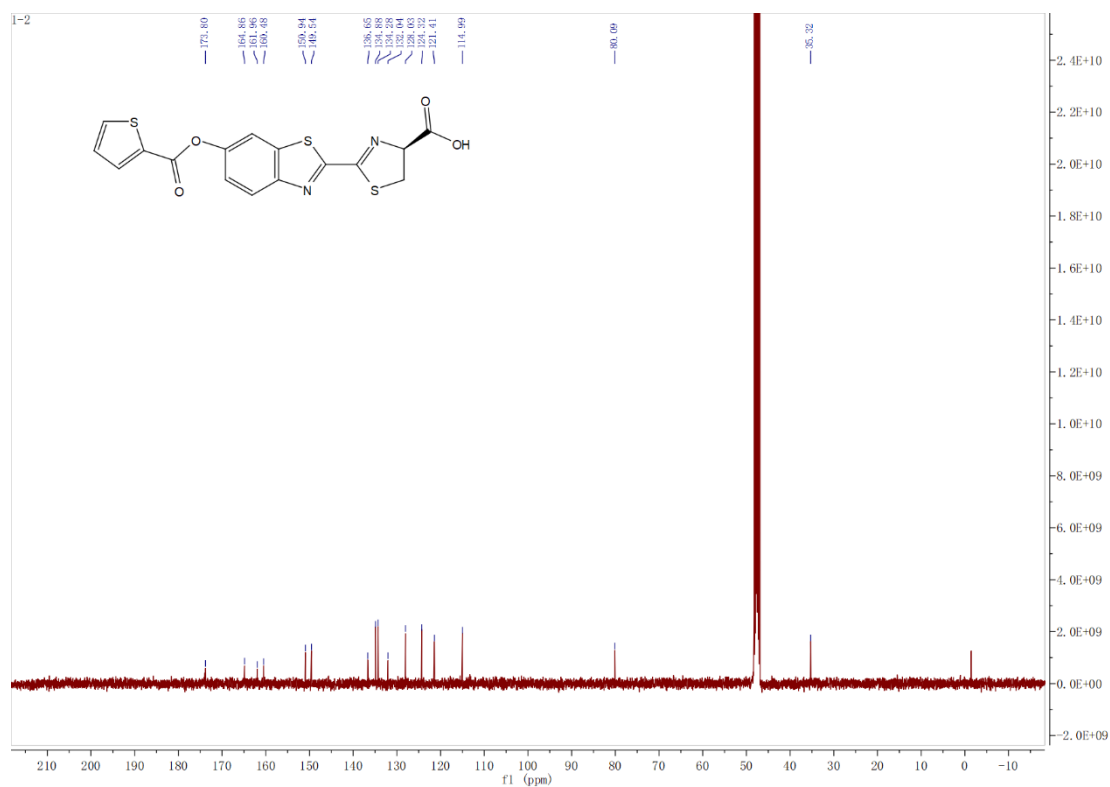

### HRMS spectra of CBP 1

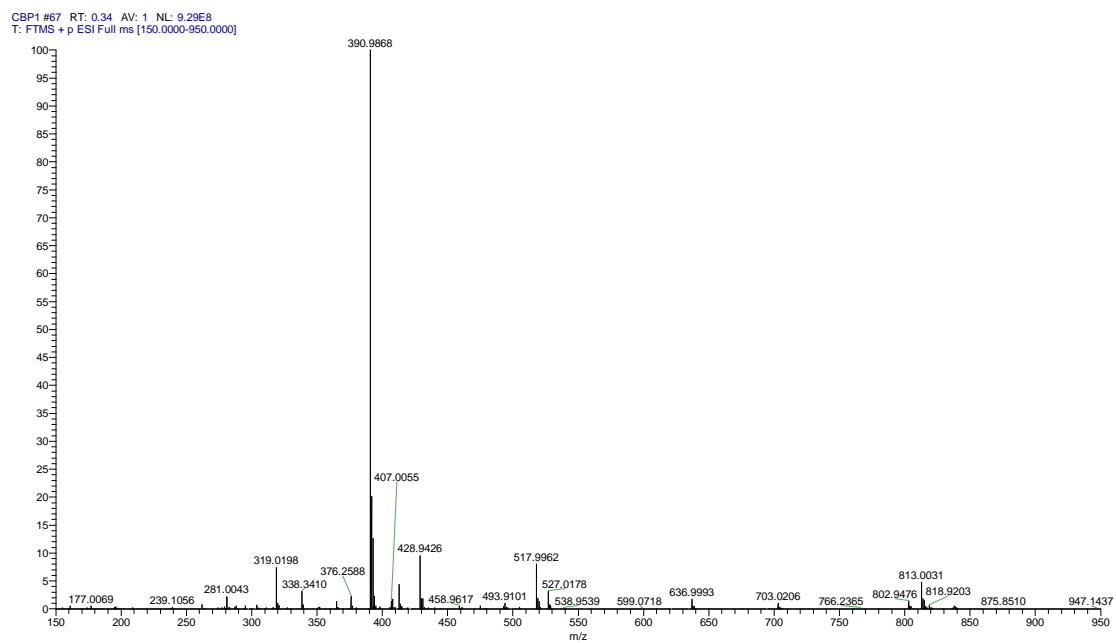

### <sup>1</sup>H-NMR spectra of compound 2c

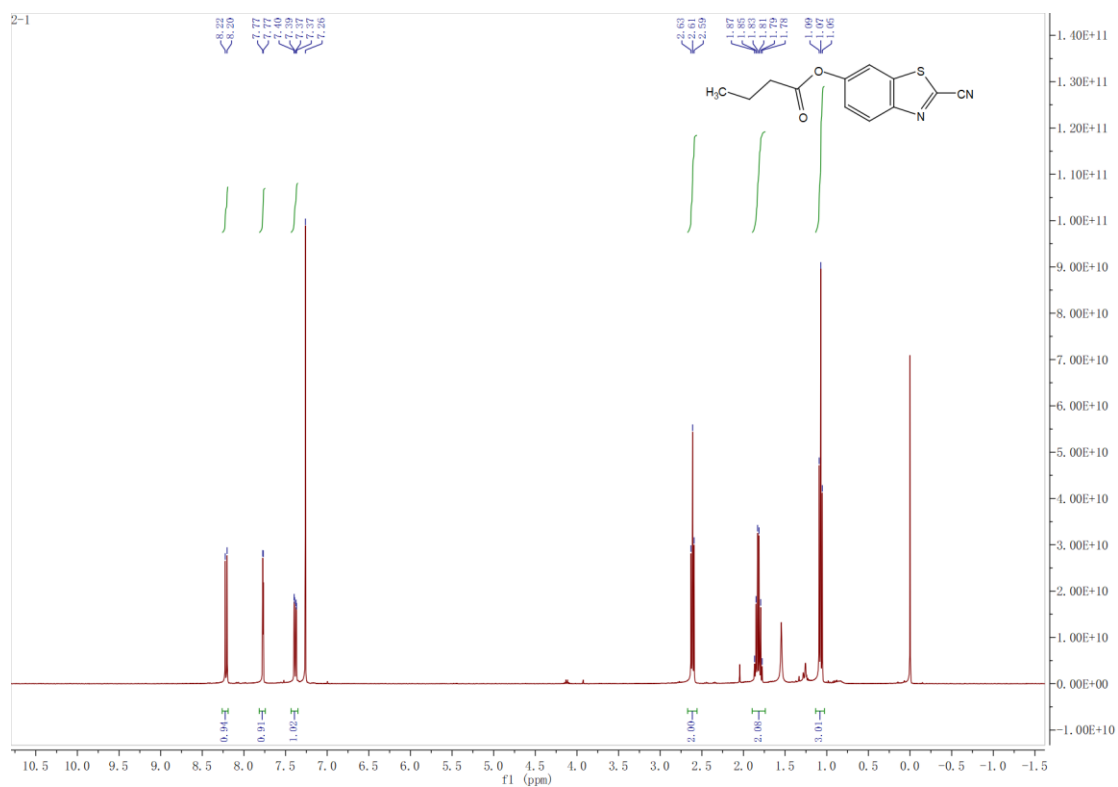

### <sup>1</sup>H-NMR spectra of CBP 2

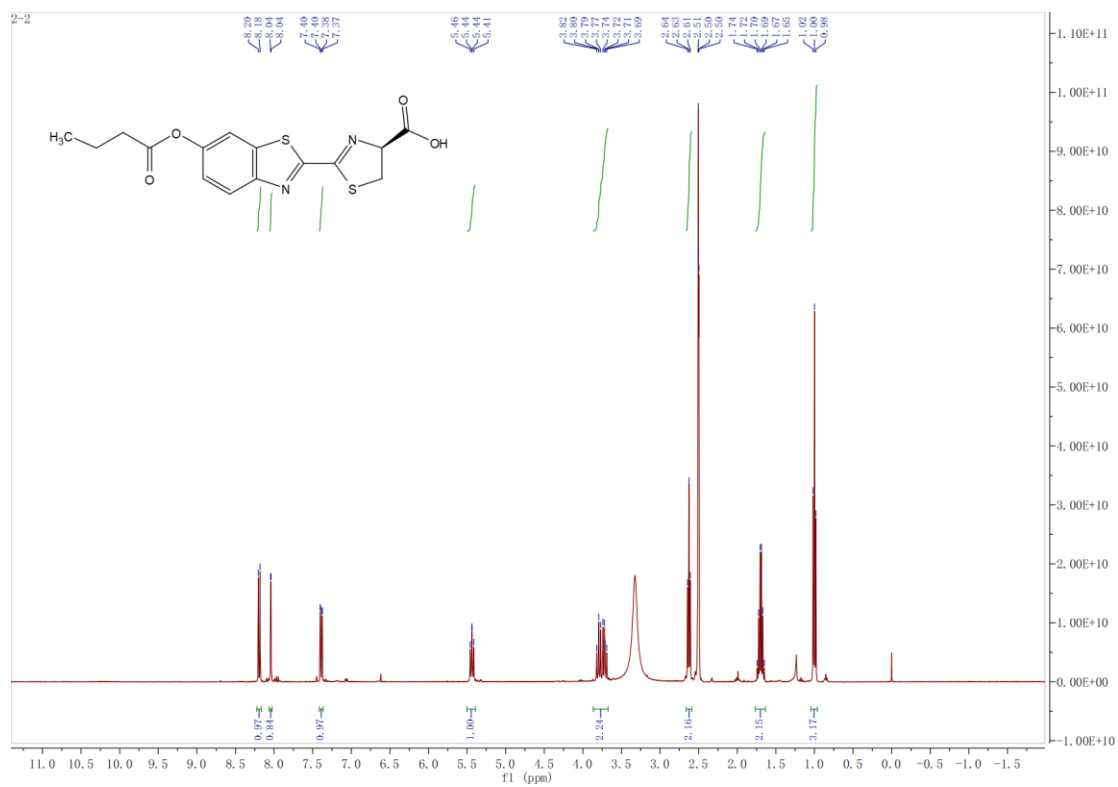

### <sup>13</sup>C-NMR spectra of CBP 2

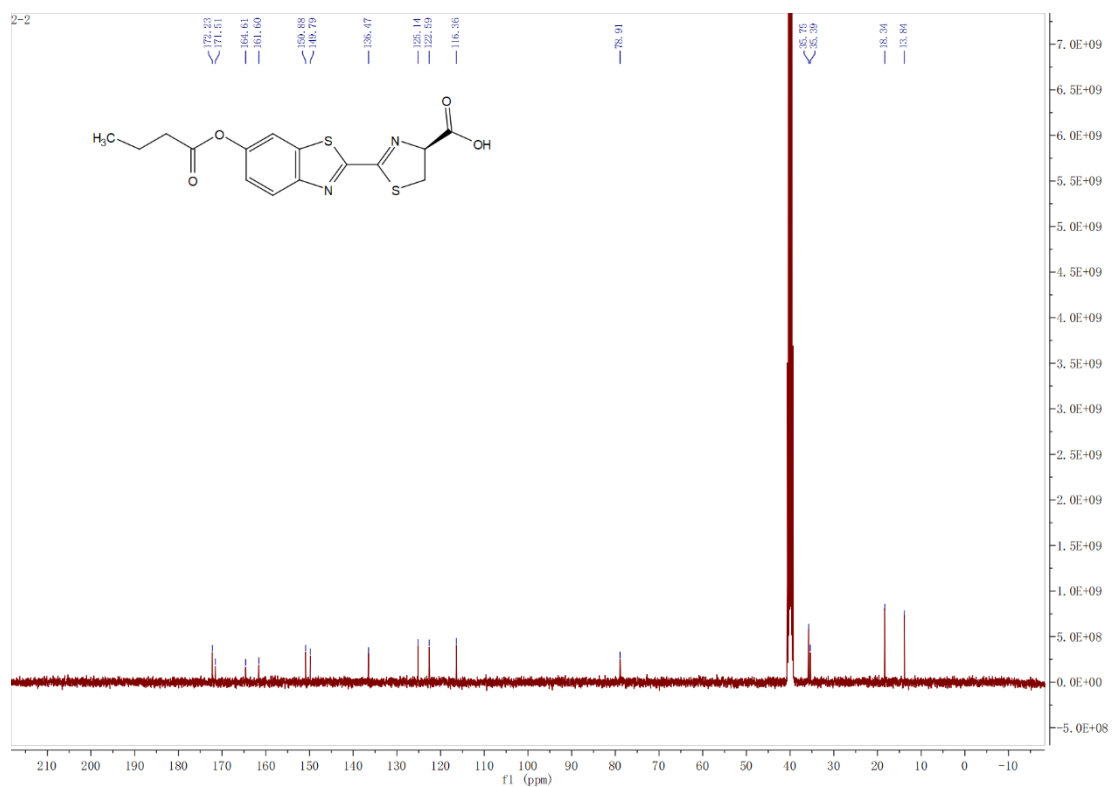

### HRMS spectra of CBP 2

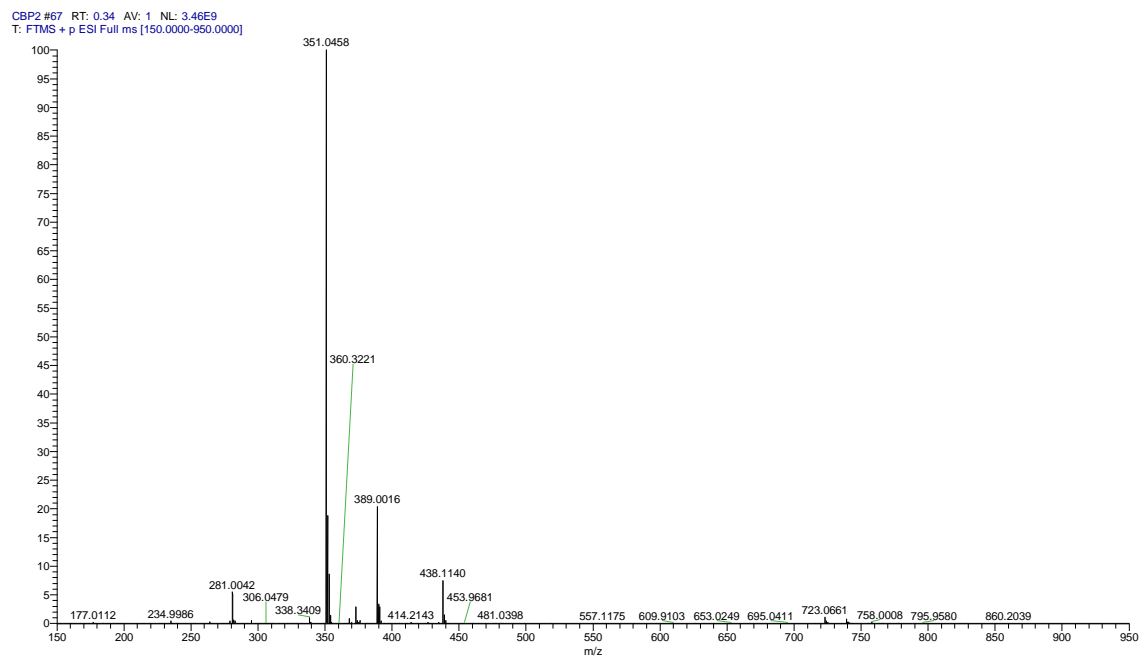

### <sup>1</sup>H-NMR spectra of compound 3c

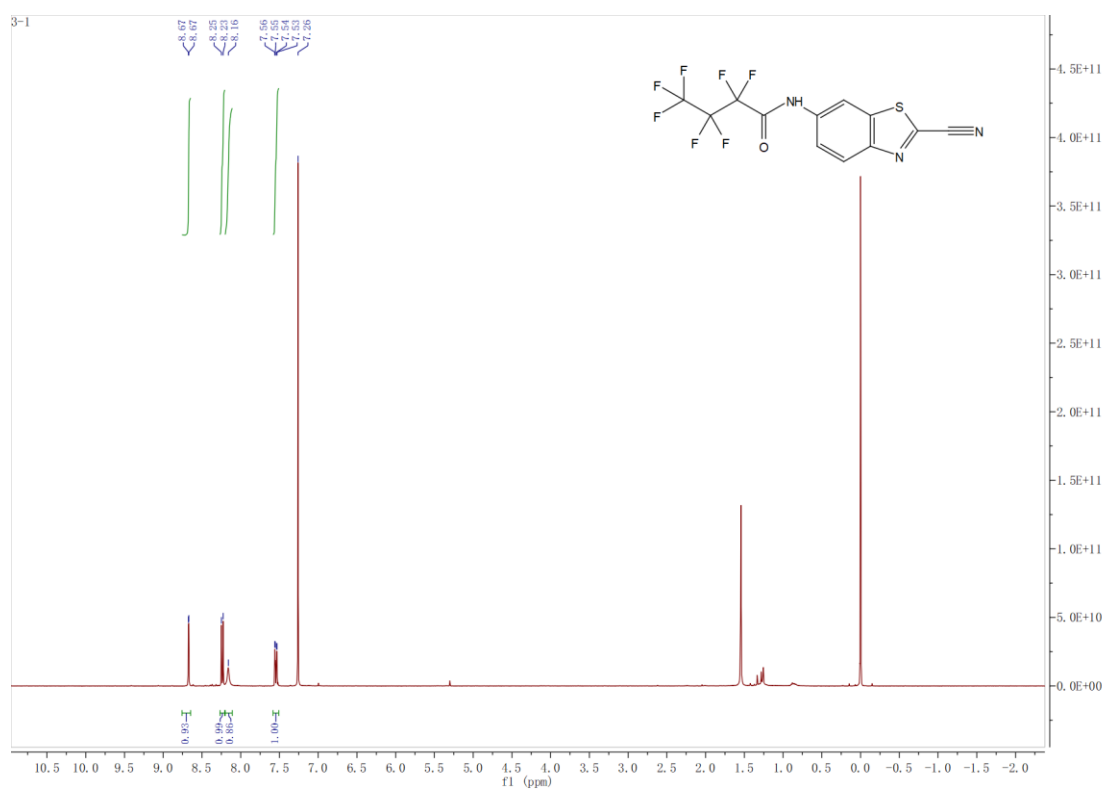

### <sup>1</sup>H-NMR spectra of CBP 3

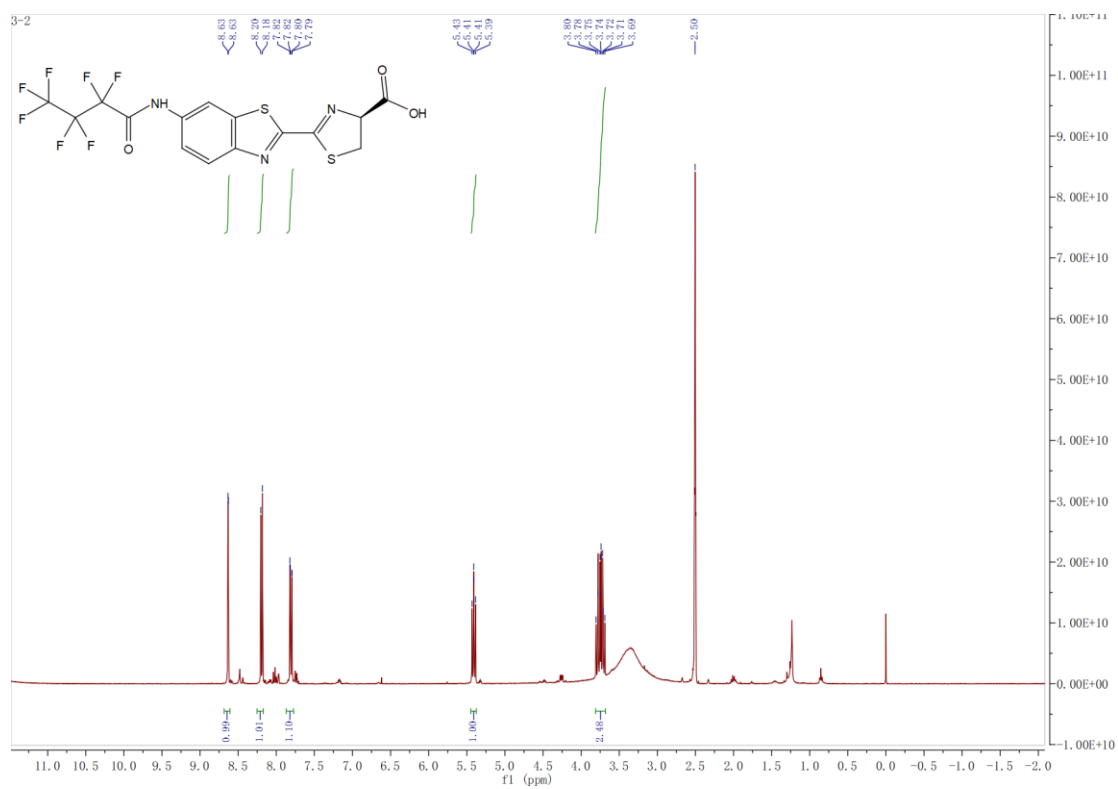

### <sup>13</sup>C-NMR spectra of CBP 3

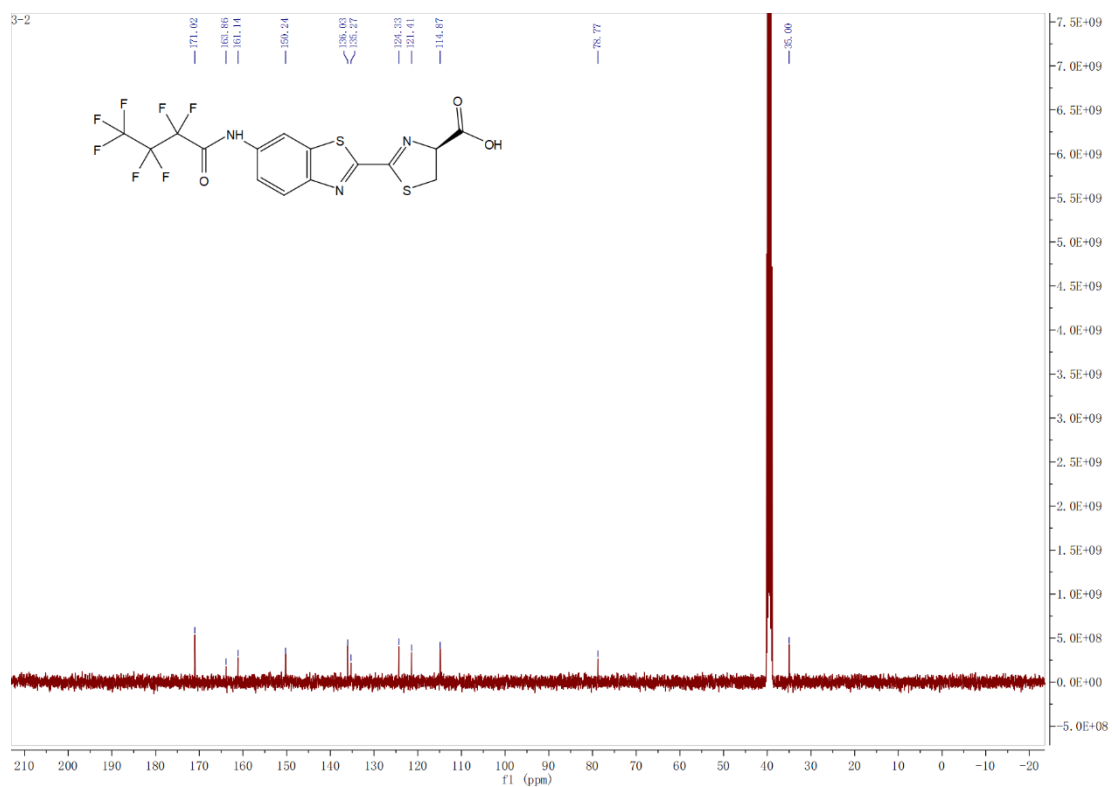

### <sup>19</sup>F-NMR spectra of CBP 3

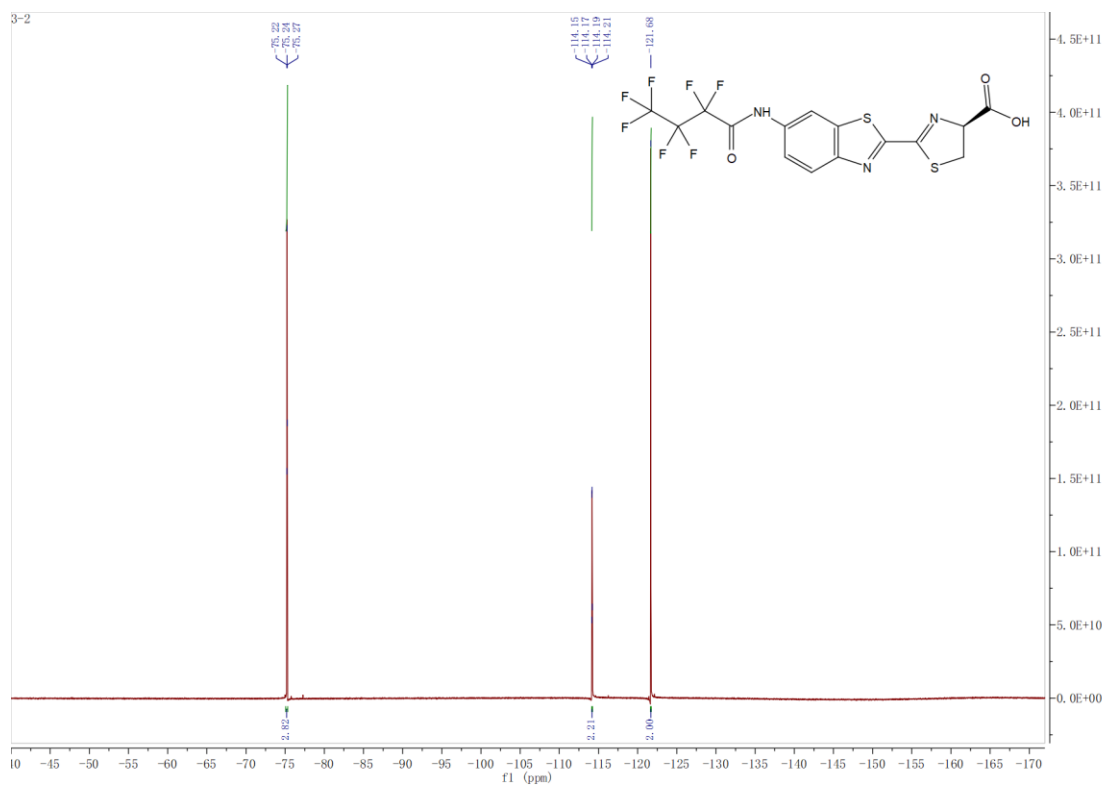

# HRMS spectra of CBP 3

CBP3 #75 RT: 0.38 AV: 1 NL: 2.63E9  
T: FTMS + p ESI Full ms [150.0000-950.0000]

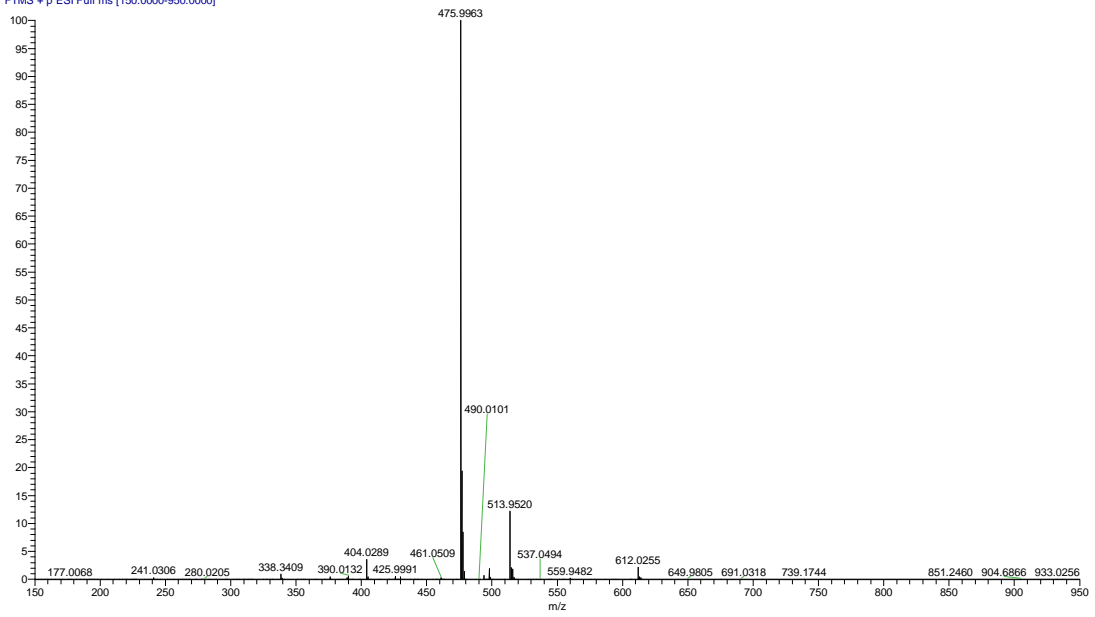



## References

1. X. Tian, F. Yan, J. Zheng, X. Cui, L. Feng, S. Li, L. Jin, T. D. James and X. Ma, *Anal. Chem.*, 2019, **91**, 15840-15845.
2. K. Kailass, O. Sadowski, M. Capello, Y. Kang, J. B. Fleming, S. M. Hanash and A. A. Beharry, *Chem. Sci.*, 2019, **10**, 8428-8437.
3. Q. Jin, L. Feng, D. D. Wang, Z. R. Dai, P. Wang, L. W. Zou, Z. H. Liu, J. Y. Wang, Y. Yu, G. B. Ge, J. N. Cui and L. Yang, *ACS Appl. Mater. Interfaces*, 2015, **7**, 28474-28481.
4. Z. Meng meng, L. Peng, H. Feng and J. Yan, *Chem. Phys. Lett.*, 2021, **785**, 139143-139148.
5. S. Y. Liu, X. Zou, Y. Guo and X. Gao, *Anal. Chim. Acta*, 2022, **1221**, 340126-340134.
6. L. Feng, Z. M. Liu, L. Xu, X. Lv, J. Ning, J. Hou, G. B. Ge, J. N. Cui and L. Yang, *Chem. Commun.*, 2014, **50**, 14519-14522.
7. J. Li, J. Cao, W. Wu, L. Xu, S. Zhang, P. Ma, Q. Wu and D. Song, *Sens. Actuators, B*, 2023, **377**, 133122-133129.
8. Z. Chen, J. Yu, K. Sun, J. Song, L. Chen, Y. Jiang and Z. Wang, *Analyst*, 2023, **148**, 876-887.
9. Y. Wang, F. Yu, X. Luo, M. Li, L. Zhao and F. Yu, *Chem. Commun.*, 2020, **56**, 4412-4415.
10. X. Y. Zhang, T. T. Liu, J. H. Liang, X. G. Tian, B. J. Zhang, H. L. Huang, X. C. Ma, L. Feng and C. P. Sun, *J. Mater. Chem. B*, 2021, **9**, 2457-2461.
11. Q. Jin, L. Feng, D. D. Wang, J. J. Wu, J. Hou, Z. R. Dai, S. G. Sun, J. Y. Wang, G. B. Ge, J. N. Cui and L. Yang, *Biosens. Bioelectron.*, 2016, **83**, 193-199.
12. C. Ozsan, K. Kailass, E. M. Digby, T. Alammadov, A. A. Beharry and S. Kolemen, *Chemical Communications*, 2022, **58**, 10929-10932.
13. J. Lamego, A. S. Coroadinha and A. L. Simplicio, *Anal Chem*, 2011, **83**, 881-887.
